# Supplementary material for: New fabrication of lanthanide complexes based on the polyoxometalate ligand of the [α(1,4)-GeW10O38]12− anion
Source: Royal Society of Chemistry journal article supplement (doi:10.1039/b820269a), 2009-01-01
Supplement: b820269a.pdf [file b820269a.pdf]

### Electronic Supplementary Information

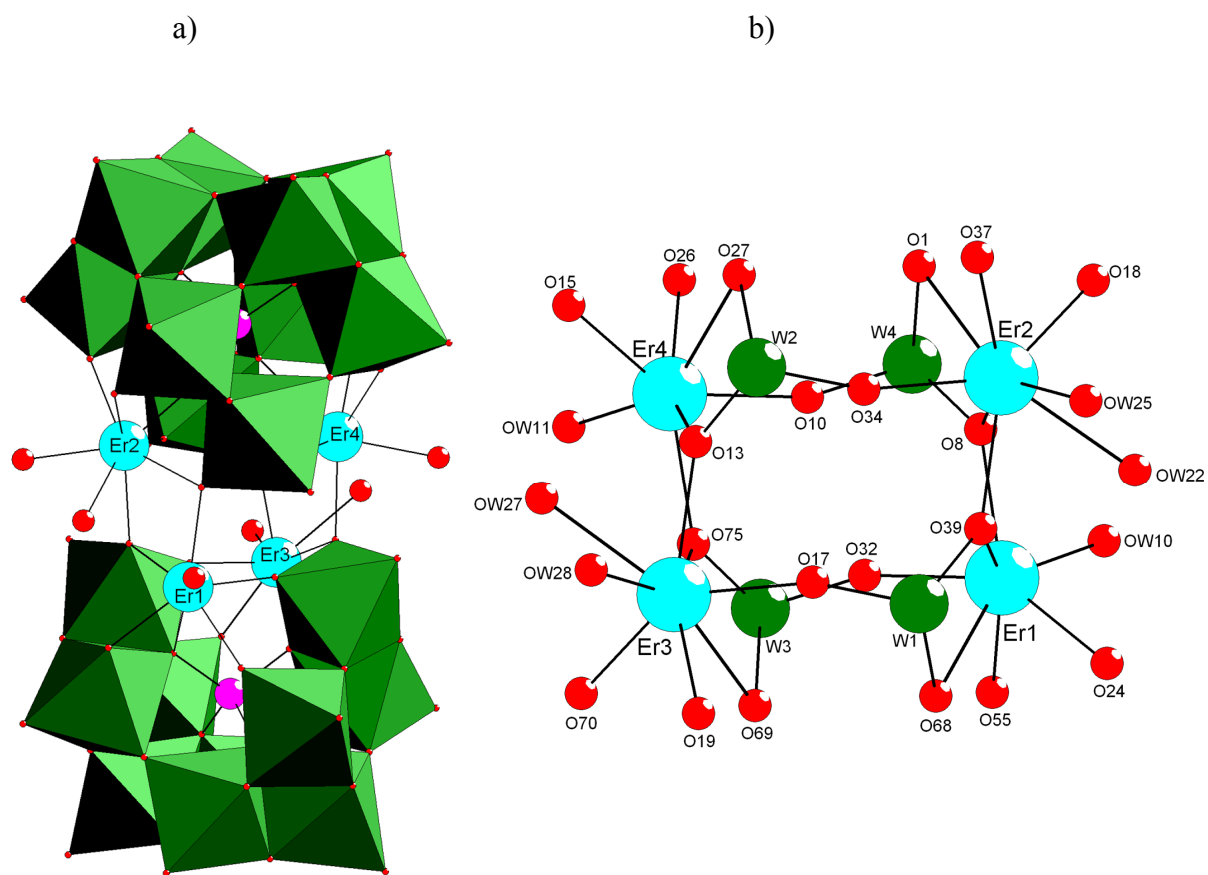

**Fig. S1.** a) Polyhedral and ball-and-stick representation of the sandwich-type structure of **2a**. b) Ball and stick representation of the central fragment of **2a**. All the isolated water molecules and sodium ions are omitted for clarity. The color code: W (green), Ge (purple), Er (cyan), O (red).

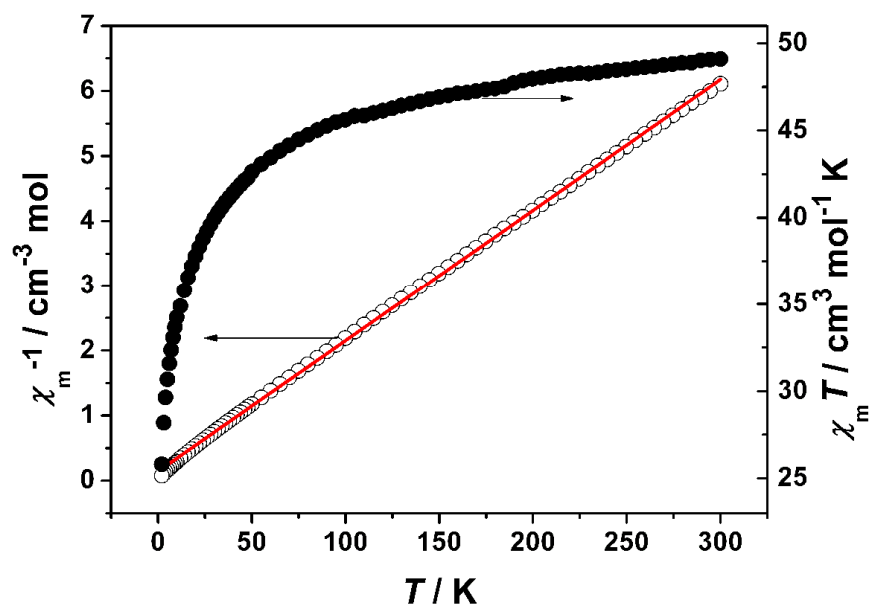

**Fig. S2.** Plots of the temperature dependence of  $\chi_m T$  (blue points) and  $1/\chi_m$  (black points) for complex **2**. The red lines show the best fit to the Curie-Weiss law.

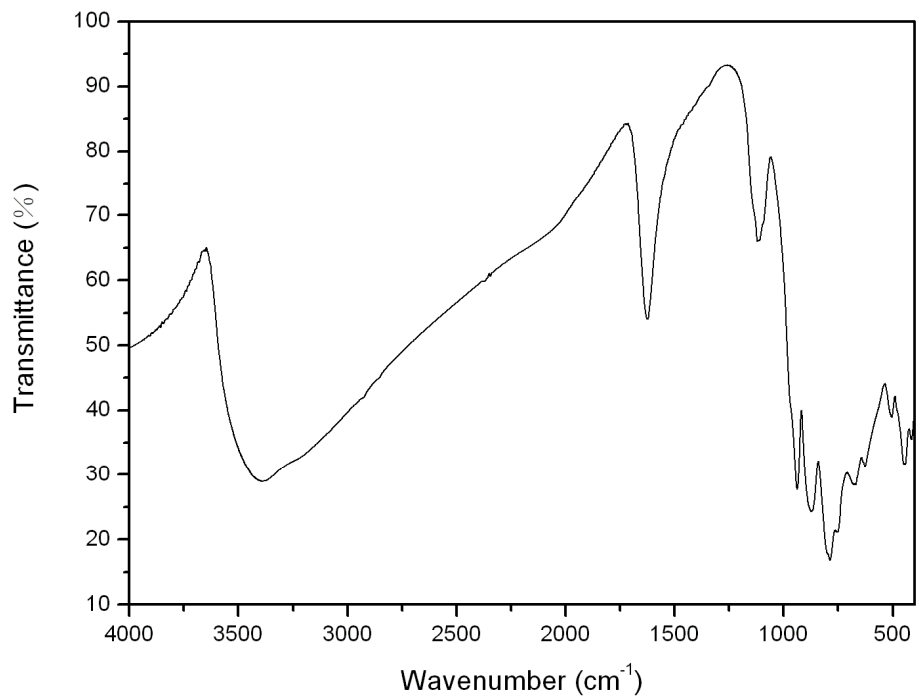

**Fig. S3.** IR spectra of complex **1**.

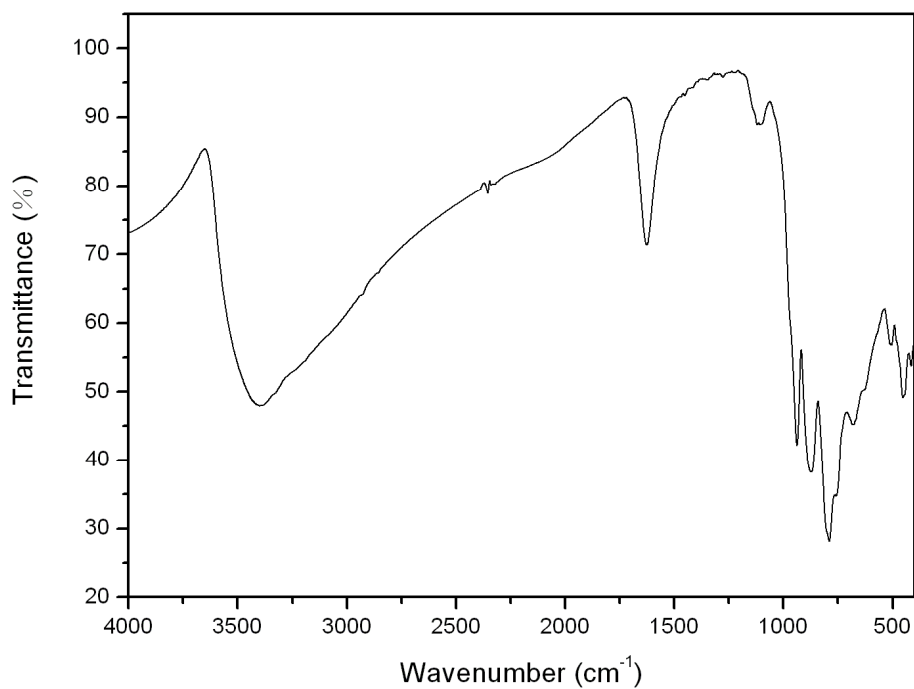

**Fig. S4.** IR spectra of complex **2**.

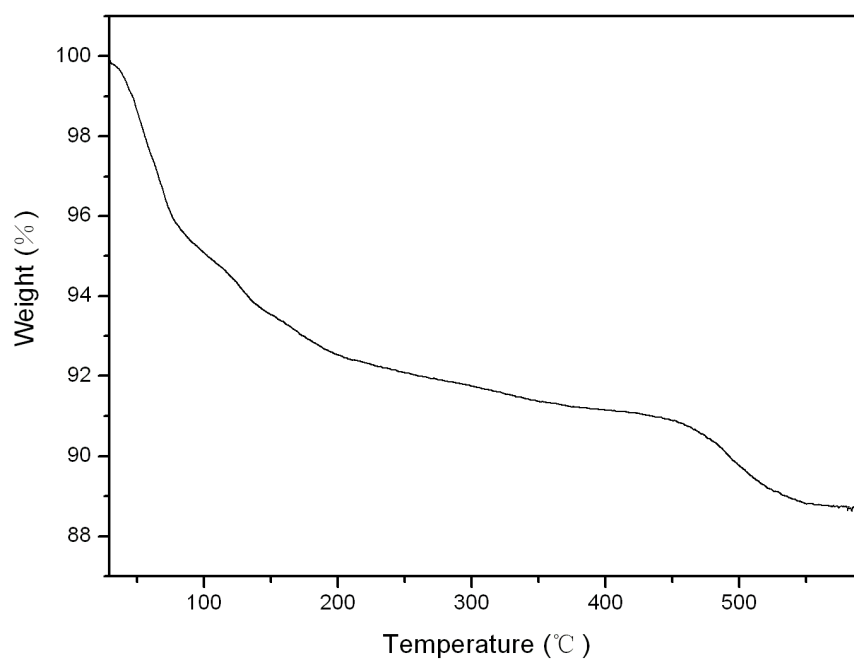

**Fig. S5.** TG curve of complex 1.

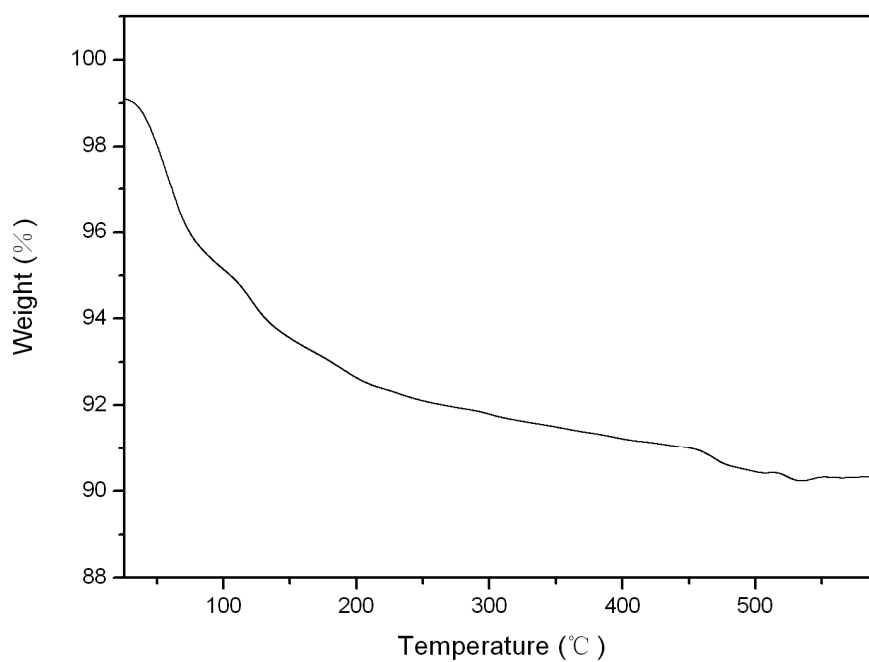

**Fig. S6.** TG curve of complex 2.
